# Supplementary material for: Effect of Cryopreservation on the Ex Vitro Establishment of Olive Plants Regenerated via Somatic Embryogenesis
Source: MDPI journal article supplement (doi:10.3390/plants10020396), 2021-02-19
Supplement: s1 [file s1]

**Table S1.** Significance by two-way ANOVA of the single and combined effects of cryopreservation and genotype on the parameters related to the regeneration capacity of olive embryogenic cultures.

| Predictor variable      | Regeneration potential | Number of shoots per germinated embryo | Shoot length (mm) |
|-------------------------|------------------------|----------------------------------------|-------------------|
| Line                    | 0.1028                 | 0.0009                                 | 0.0000            |
| Cryopreservation        | 0.4553                 | 0.5550                                 | 0.3789            |
| Line x cryopreservation | 0.4618                 | 0.4141                                 | 0.2799            |

**Table S2.** Significance by two-way ANOVA and three-way log-linear analysis of the single and combined effects of cryopreservation and genotype during ex vitro plant establishment.

| Predictor variable      | Number of axillary shoots per explant | Shoot length (mm) | Rooting percentage | Number of roots per shoot | Root length (mm) | Acclimatization percentage |
|-------------------------|---------------------------------------|-------------------|--------------------|---------------------------|------------------|----------------------------|
| Line                    | 0.0000                                | 0.4060            | 0.0004             | 0.6154                    | 0.1844           | 0.5333                     |
| Cryopreservation        | 0.6850                                | 0.9160            | 0.2464             | 0.0595                    | 0.0575           | 0.6232                     |
| Line x cryopreservation | 0.6680                                | 0.0430            | 0.3215             | 0.3442                    | 0.2874           | 1.0000                     |
